# Supplementary material for: Structural, electrochemical and spectroelectrochemical study on the geometric and electronic structures of [(corrolato)AuIII]n (n = 0, +1, −1) complexes
Source: Royal Society of Chemistry journal article supplement (doi:10.1039/c5dt03737a), 2015-12-09
Supplement: c5dt03737a1.pdf [file c5dt03737a1.pdf]

## Electronic Supplementary Information (ESI) †

### Structural, Electrochemical and Spectroelectrochemical

### Study on the Geometric and Electronic Structures of

### $[(\text{corrolato})\text{Au}^{\text{III}}]^n$ ( $n = 0, +1, -1$ ) Complexes

Woormileela Sinha,<sup>a</sup> Michael G. Sommer,<sup>b</sup> Margarethe van der Meer,<sup>b</sup> Sebastian Plebst,<sup>c</sup> Biprajit Sarkar,<sup>\*b</sup> and Sanjib Kar<sup>\*a</sup>

<sup>a</sup>School of Chemical Sciences, National Institute of Science Education and Research (NISER), Bhubaneswar – 751005, India, E-mail: sanjib@niser.ac.in

<sup>b</sup>Institut für Chemie und Biochemie, Anorganische Chemie, Fabeckstraße 34-36, D-14195, Berlin, Germany, E-mail: biprajit.sarkar@fu-berlin.de

<sup>c</sup>Institut für Anorganische Chemie, Universität Stuttgart, Pfaffenwaldring 55, D-70569, Stuttgart, Germany

- Table S1** Crystallographic Data for **2**
- Table S2** UV-vis. and electrochemical data
- Fig. S1** ESI-MS spectrum of (a) 10-(2,4,5-trimethoxyphenyl)-5,15-bis(4-cyanophenyl)corrolato-Au(III), **1**, and (b) 10-(4,7-dimethoxynaphthalen-1-yl)-5,15-bis(4-cyanophenyl) corrolato-Au(III), **2** in CH<sub>3</sub>CN shows the measured spectrum with isotopic distribution pattern.
- Fig. S2** <sup>1</sup>H NMR spectrum of 10-(2,4,5-Trimethoxyphenyl)-5,15-bis(4-cyanophenyl)corrolato- Au(III), **1** in CDCl<sub>3</sub>.
- Fig. S3** <sup>1</sup>H NMR spectrum of 10-(4,7-dimethoxynaphthalen-1-yl)-5,15-bis(4-cyanophenyl) corrolato- Au(III), **2** in CDCl<sub>3</sub>.
- Fig. S4** <sup>13</sup>C NMR spectrum of 10-(4,7-dimethoxynaphthalen-1-yl)-5,15-bis(4-cyanophenyl)corrolato-Au(III), **2** in CDCl<sub>3</sub>.
- Fig. S5** ORTEP diagram of **2**. Ellipsoids are drawn at 50% probability.
- Fig. S6** Orientation of gold atoms in the single-crystal X-ray structure of **2**.
- Fig. S7** X-band EPR spectrum of a) (**2**)<sup>2+</sup> with simulation and b) (**2**)<sup>•+</sup> generated by *in-situ* electrolysis at 295 K in CH<sub>2</sub>Cl<sub>2</sub>/0.1 M Bu<sub>4</sub>NPF<sub>6</sub>.
- Fig. S8** Electronic absorption spectrum of 10-(2,4,5-trimethoxyphenyl)-5,15-bis(4-cyanophenyl)corrolato-Au(III), **1**, (red line) and 10-(4,7-dimethoxynaphthalen-1-yl)-5,15-bis(4-cyanophenyl)corrolato-Au(III), **2**, (blue line) in CH<sub>2</sub>Cl<sub>2</sub>. (Color online.)
- Fig. S9** Change in the UV-Vis spectrum of **2** during a) first oxidation and b) first reduction. Result from OTTE spectroelectrochemistry in CH<sub>2</sub>Cl<sub>2</sub> /0.1 M Bu<sub>4</sub>NPF<sub>6</sub>.
- Fig. S10** The calculated absorption spectra for **1**, showing the TD-DFTcalculated electronic transitions.
- Fig. S11** The calculated absorption spectra for **1**<sup>+</sup>, showing the TD-DFTcalculated electronic transitions.

- Fig. S12** The calculated absorption spectra for  $\mathbf{1}^-$ , showing the TD-DFTcalculated electronic transitions.
- Fig. S13** The calculated absorption spectra for  $\mathbf{2}$ , showing the TD-DFTcalculated electronic transitions.
- Fig. S14** The calculated absorption spectra for  $\mathbf{2}^+$ , showing the TD-DFTcalculated electronic transitions.
- Fig. S15** The calculated absorption spectra for  $\mathbf{2}^-$ , showing the TD-DFTcalculated electronic transitions.

**Table S1** Crystallographic Data for **2**

|                                                  |                                                                                                  |
|--------------------------------------------------|--------------------------------------------------------------------------------------------------|
| molecular formula                                | C <sub>45</sub> H <sub>27</sub> Au N <sub>6</sub> O <sub>2</sub> , C <sub>6</sub> H <sub>6</sub> |
| Fw                                               | 958.83                                                                                           |
| Radiation                                        | MoK $\alpha$                                                                                     |
| crystal symmetry                                 | Triclinic                                                                                        |
| space group                                      | P-1                                                                                              |
| <i>a</i> (Å)                                     | 8.6926 (9)                                                                                       |
| <i>b</i> (Å)                                     | 15.5671 (16)                                                                                     |
| <i>c</i> (Å)                                     | 15.6537 (16)                                                                                     |
| $\alpha$ (deg)                                   | 106.257(3)                                                                                       |
| $\beta$ (deg)                                    | 106.034(3)                                                                                       |
| $\gamma$ (deg)                                   | 95.639(3)                                                                                        |
| <i>V</i> (Å <sup>3</sup> )                       | 1918.7(3)                                                                                        |
| <i>Z</i>                                         | 2                                                                                                |
| $\mu$ (mm <sup>-1</sup> )                        | 3.887                                                                                            |
| <i>T</i> (K)                                     | 100 K                                                                                            |
| <i>D</i> <sub>calcd</sub> (g cm <sup>-3</sup> )  | 1.660                                                                                            |
| 2 $\theta$ range (deg)                           | 2.78 to 50.70                                                                                    |
| <i>e</i> data ( <i>R</i> <sub>int</sub> )        | 6891 (0.0451)                                                                                    |
| <i>R</i> 1 ( <i>I</i> > 2 $\sigma$ ( <i>I</i> )) | 0.0432                                                                                           |
| WR2                                              | 0.1195                                                                                           |
| GOF                                              | 0.995                                                                                            |

**Table S2** UV-vis. and electrochemical data

| Compound | UV-vis. Data <sup>a</sup><br>$\lambda_{\text{max}} / \text{nm} (\epsilon / \text{M}^{-1}\text{cm}^{-1})$ | Electrochemical data <sup>a,b</sup>                  |                                                      |
|----------|----------------------------------------------------------------------------------------------------------|------------------------------------------------------|------------------------------------------------------|
|          |                                                                                                          | Oxidation<br>$E^0, \text{V} (\Delta E_p, \text{mV})$ | Reduction<br>$E^0, \text{V} (\Delta E_p, \text{mV})$ |
| <b>1</b> | 422 (1,61,500)<br>494 (4,700)<br>530 (10,700)<br>574 (41,500)                                            | 0.39(70)<br>0.72(80)                                 | -1.81(80)<br>-2.17(80)                               |
| <b>2</b> | 423 (1,42,200)<br>494 (3,700)<br>533 (9,300)<br>572 (37,000)                                             | 0.42(70)<br>0.79(80)                                 | -1.78(80)<br>-2.13(80)                               |

<sup>a</sup>In dichloromethane / 0.1 M TBAP.

<sup>b</sup>The potentials are vs.  $Fc/Fc^+$ .

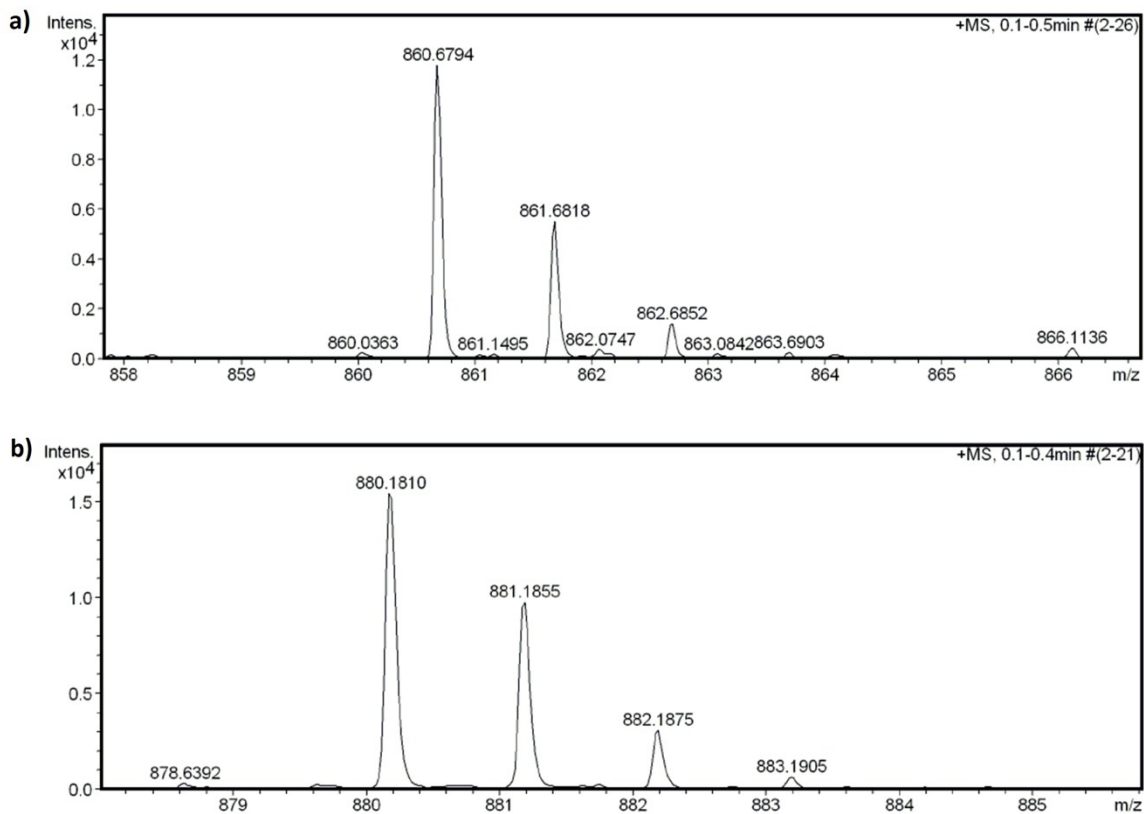

**Fig. S1** ESI-MS spectrum of (a) 10-(2,4,5-trimethoxyphenyl)-5,15-bis(4-cyanophenyl)corrolato-Au(III), **1**, and (b) 10-(4,7-dimethoxynaphthalen-1-yl)-5,15-bis(4-cyanophenyl) corrolato-Au(III), **2** in  $\text{CH}_3\text{CN}$  shows the measured spectrum with isotopic distribution pattern.

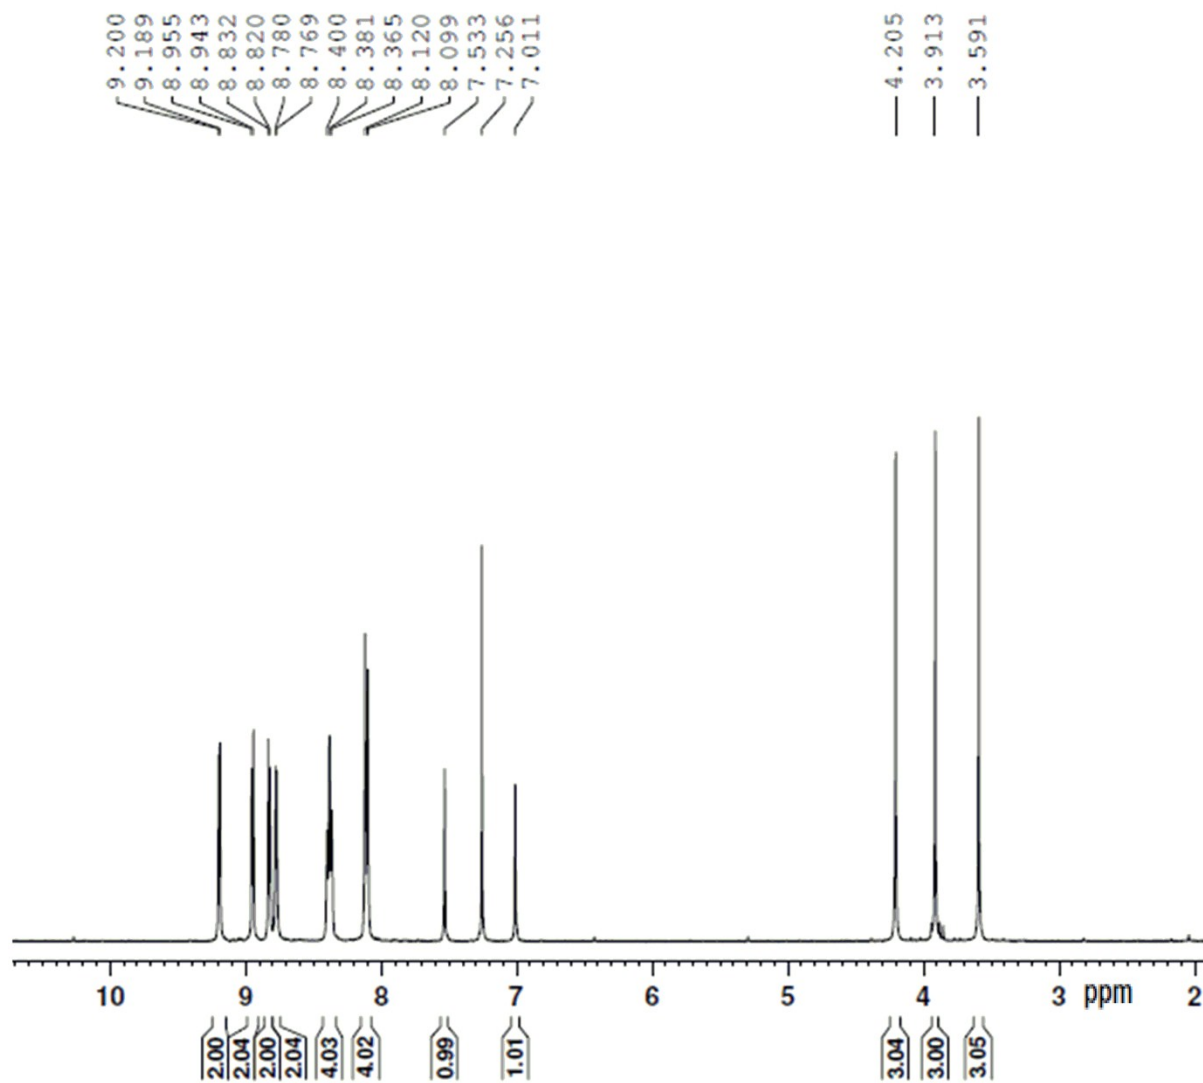

**Fig. S2**  $^1\text{H}$  NMR spectrum of 10-(2,4,5-Trimethoxyphenyl)-5,15-bis(4-cyanophenyl)corrolato- Au(III), **1** in  $\text{CDCl}_3$ .

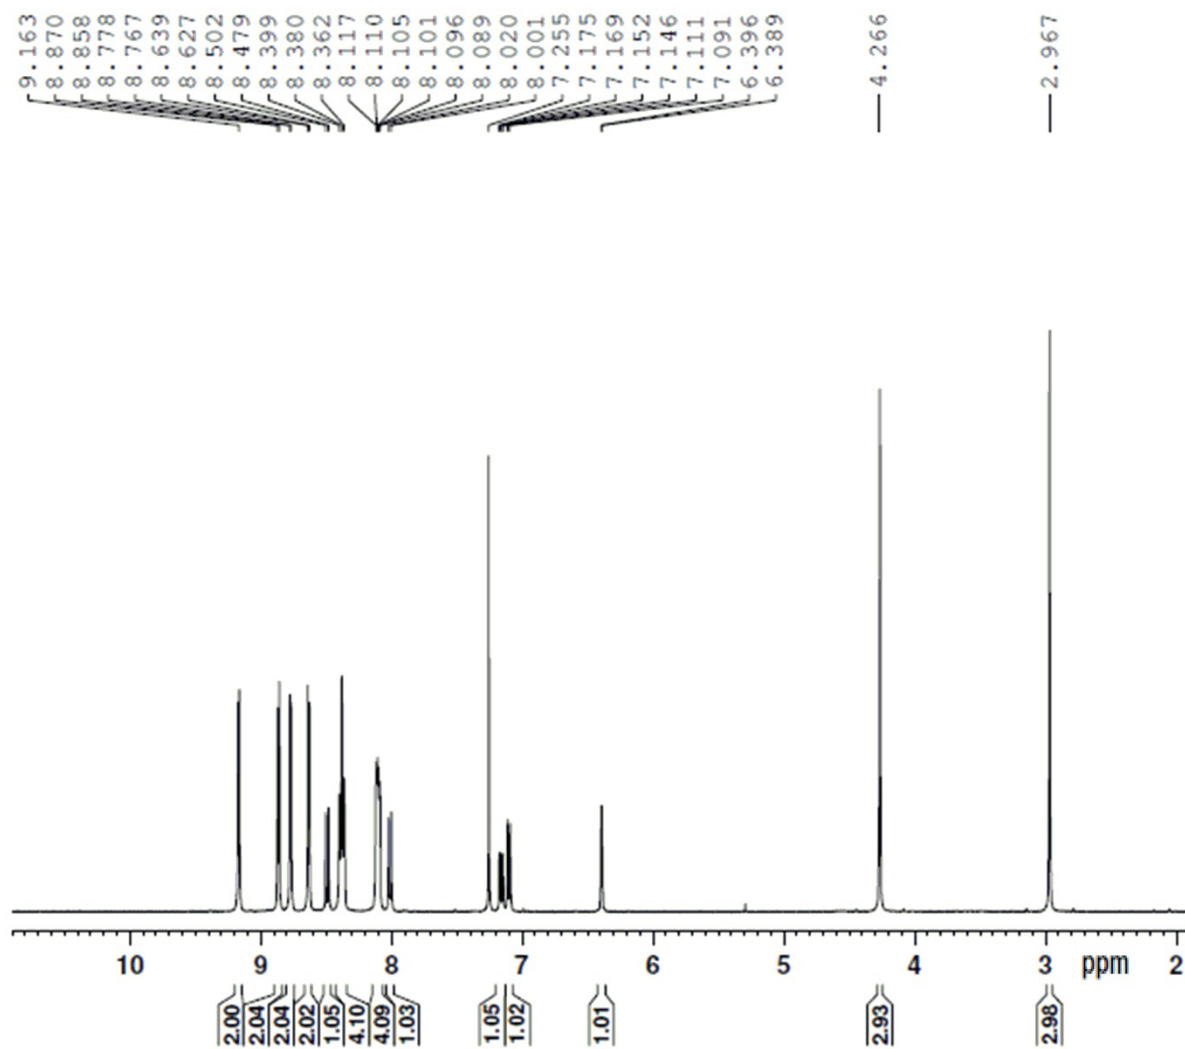

**Fig. S3**  $^1\text{H}$  NMR spectrum of 10-(4,7-dimethoxynaphthalen-1-yl)-5,15-bis(4-cyanophenyl) corrolato- Au(III), **2** in  $\text{CDCl}_3$ .



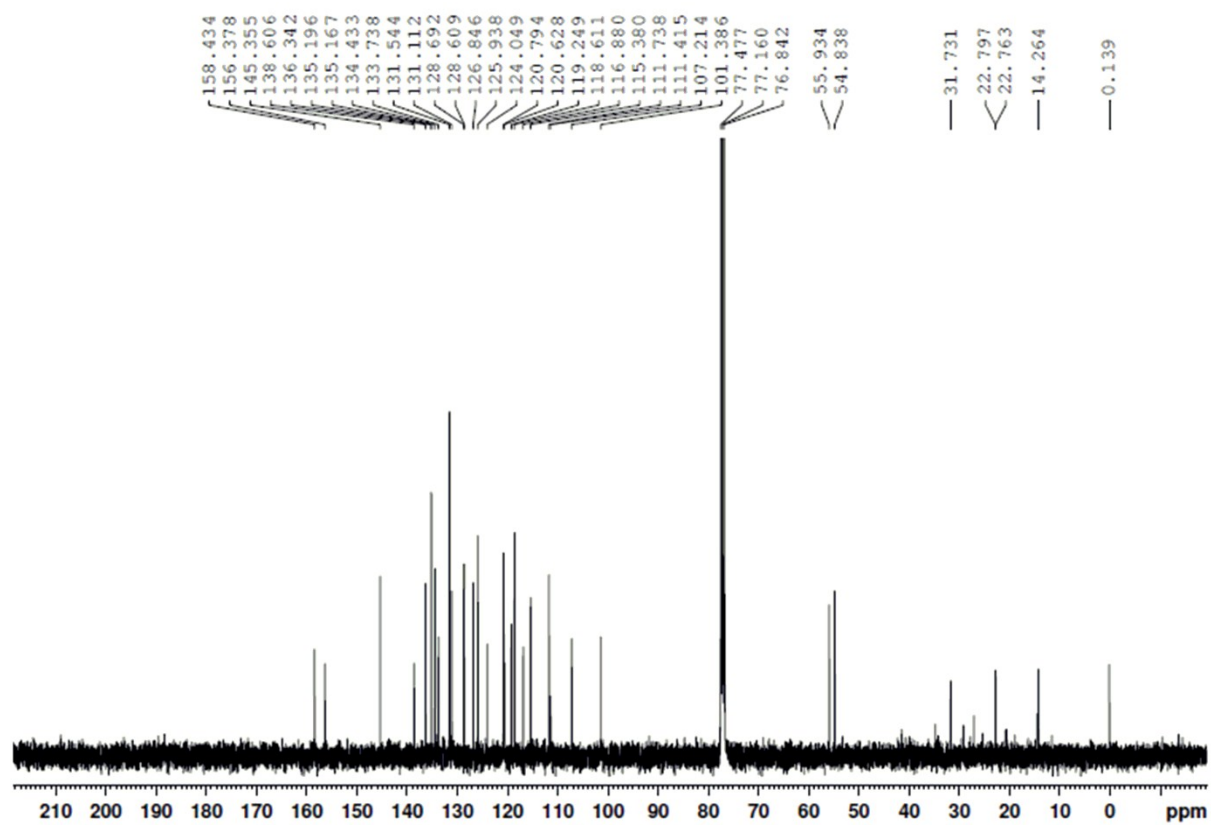

**Fig. S4**  $^{13}\text{C}$  NMR spectrum of 10-(4,7-dimethoxynaphthalen-1-yl)-5,15-bis(4-cyanophenyl)corrolato-Au(III), **2** in  $\text{CDCl}_3$ .

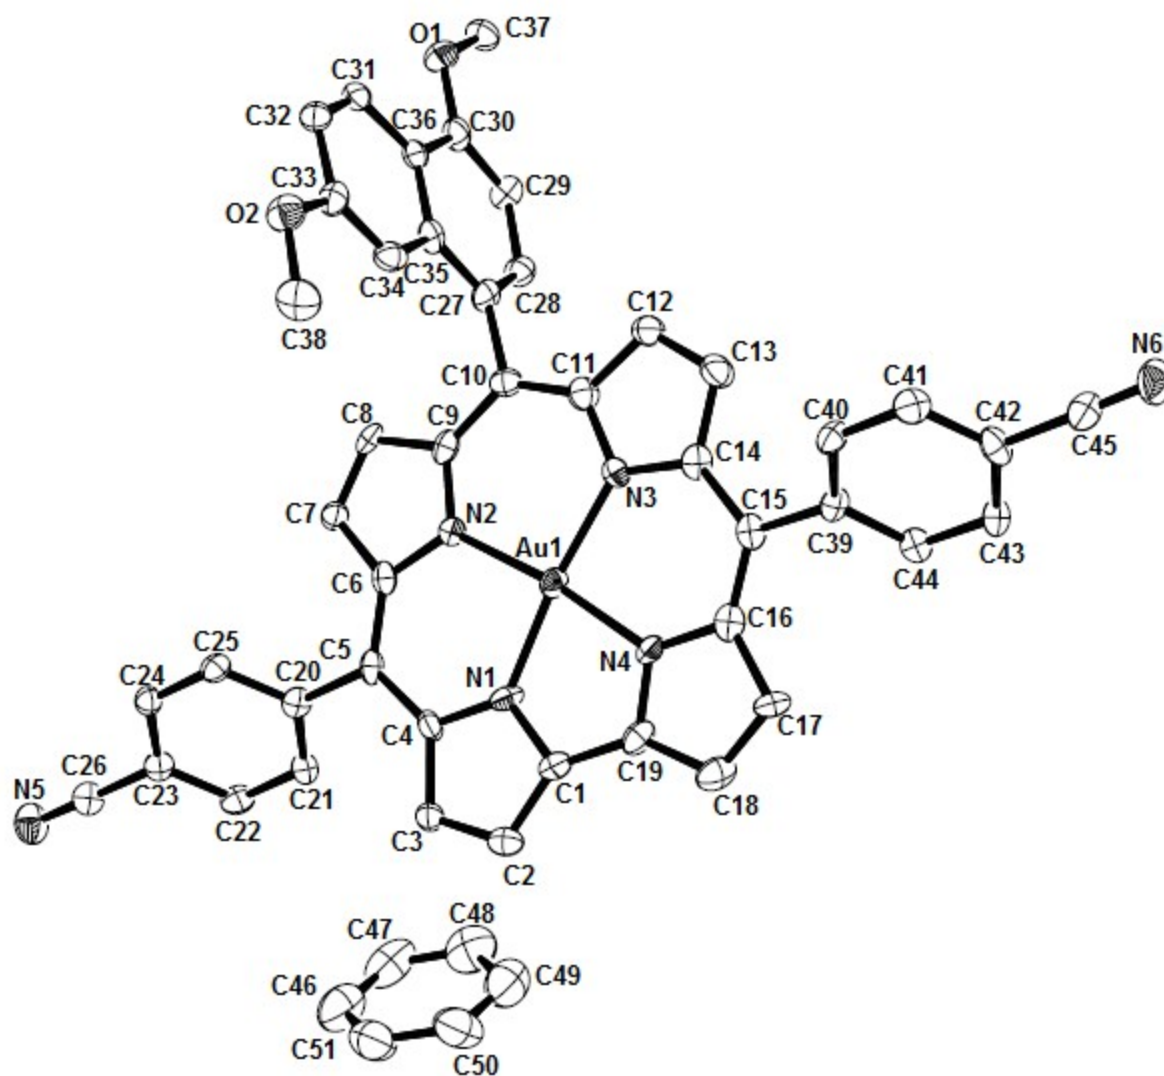

**Fig. S5** ORTEP diagram of 2. Ellipsoids are drawn at 50% probability.

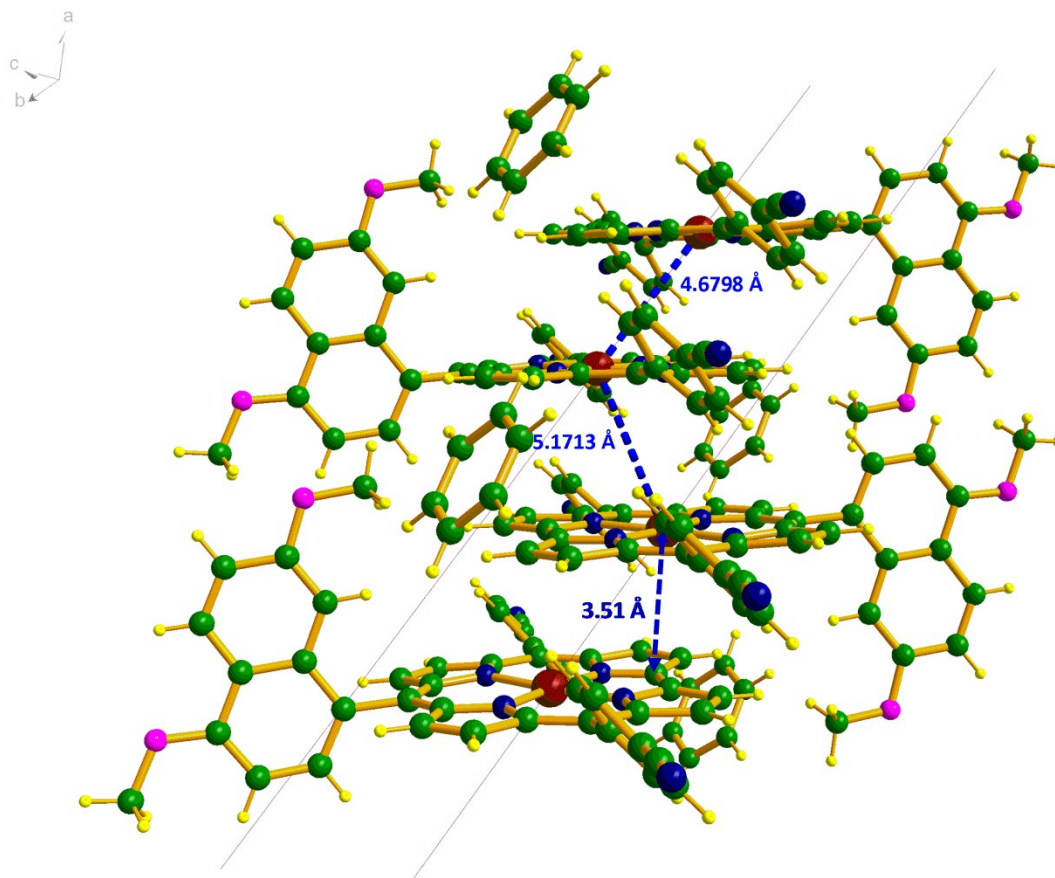

**Fig. S6** Orientation of gold atoms in the single-crystal X-ray structure of **2**.

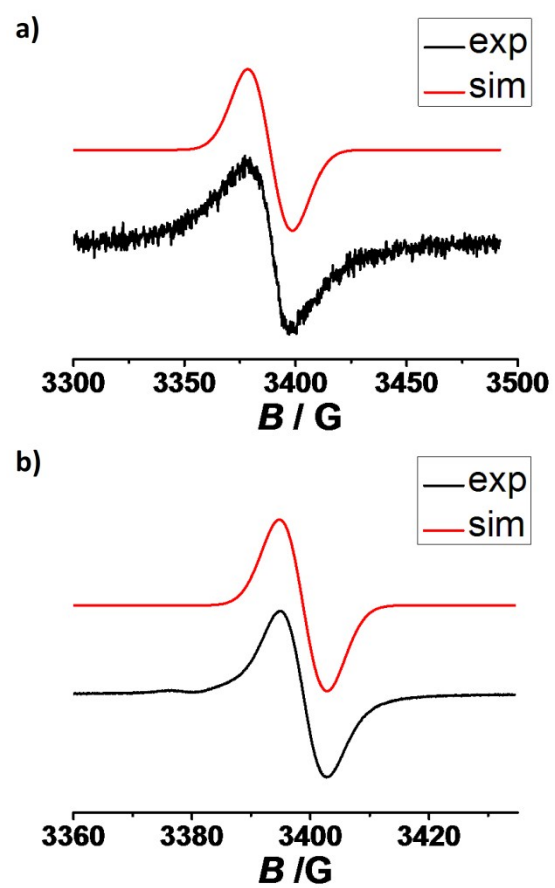

**Fig. S7** X-band EPR spectrum of a)  $(2)^{\bullet+}$  with simulation and b)  $(2)^{\bullet-}$  generated by *in-situ* electrolysis at 295 K in  $\text{CH}_2\text{Cl}_2/0.1 \text{ M Bu}_4\text{NPF}_6$ .

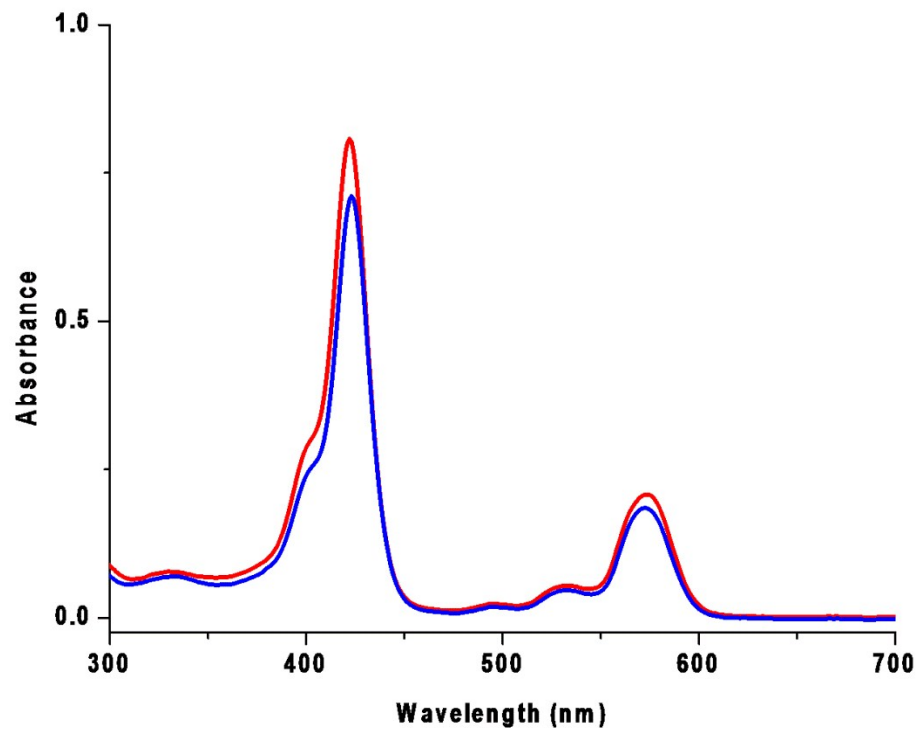

**Fig. S8** Electronic absorption spectrum of 10-(2,4,5-trimethoxyphenyl)-5,15-bis(4-cyanophenyl)corrolato-Au(III), **1**, (red line) and 10-(4,7-dimethoxynaphthalen-1-yl)-5,15-bis(4-cyanophenyl)corrolato-Au(III), **2**, (blue line) in  $\text{CH}_2\text{Cl}_2$ . (Color online.)

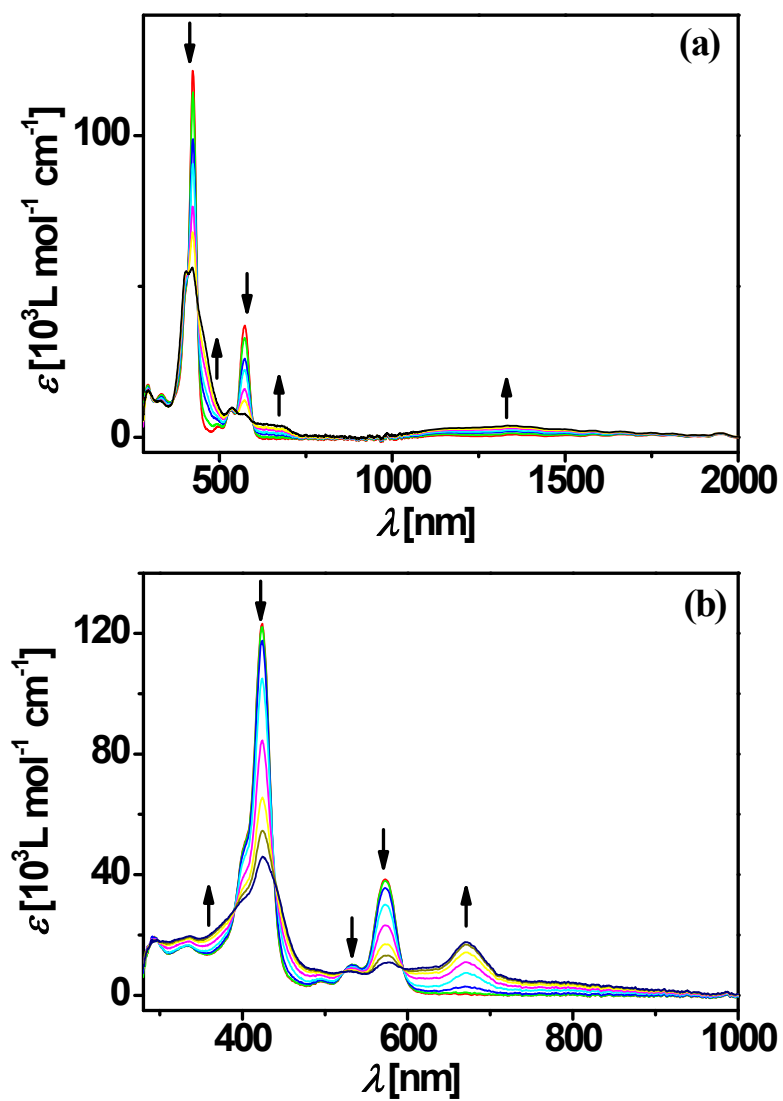

**Fig. S9** Change in the UV-Vis spectrum of **2** during a) first oxidation and b) first reduction. Result from OTTLE spectroelectrochemistry in  $\text{CH}_2\text{Cl}_2$  /0.1 M  $\text{Bu}_4\text{NPF}_6$ .

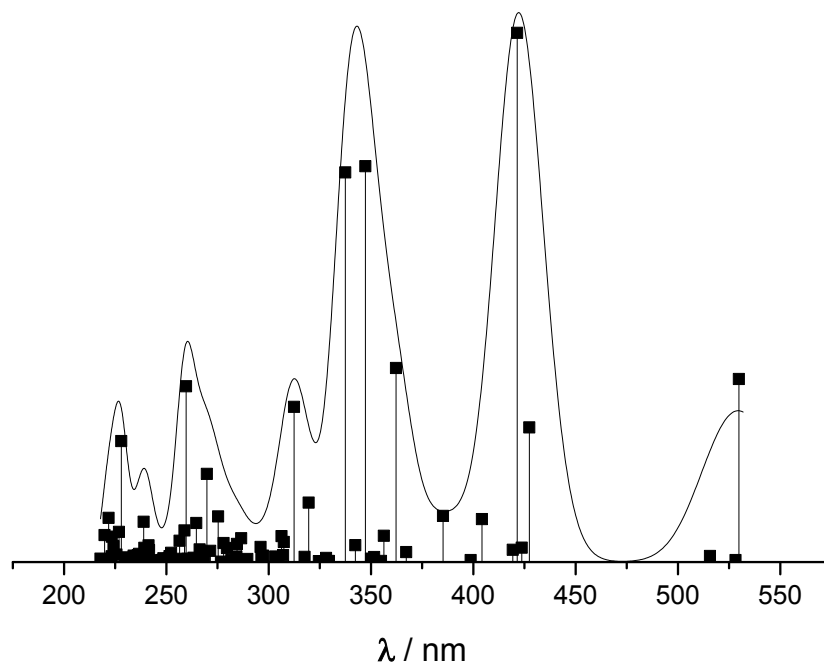

**Fig. S10** The calculated absorption spectra for **1**, showing the TD-DFT-calculated electronic transitions.

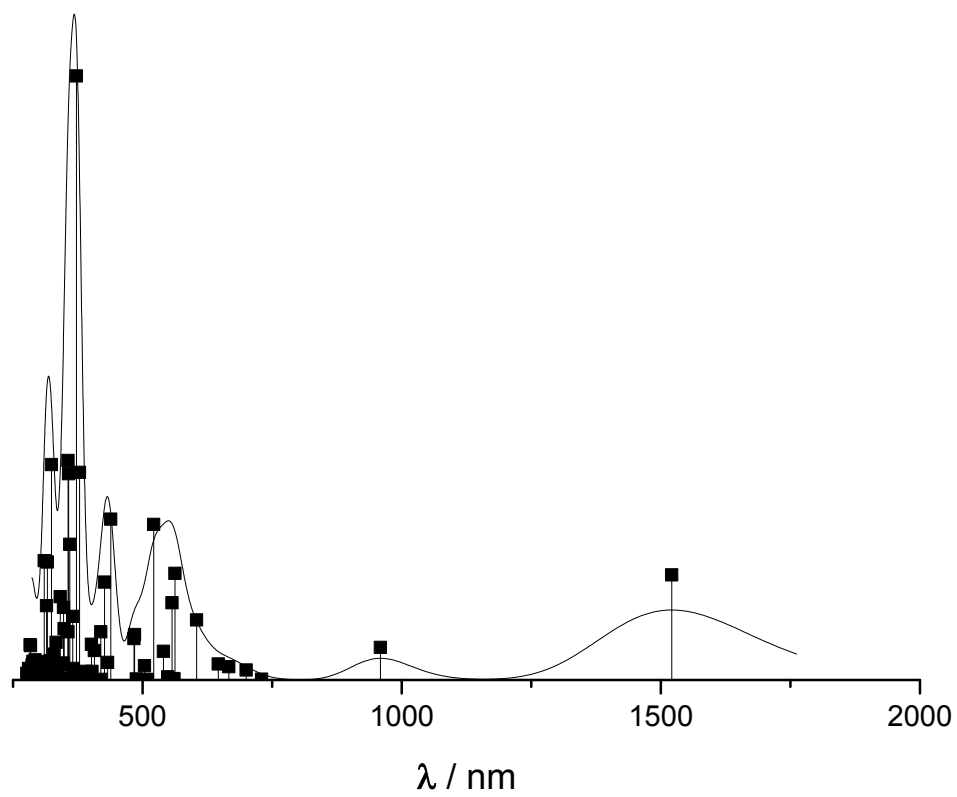

**Fig. S11** The calculated absorption spectra for  $1^+$ , showing the TD-DFTcalculated electronic transitions.



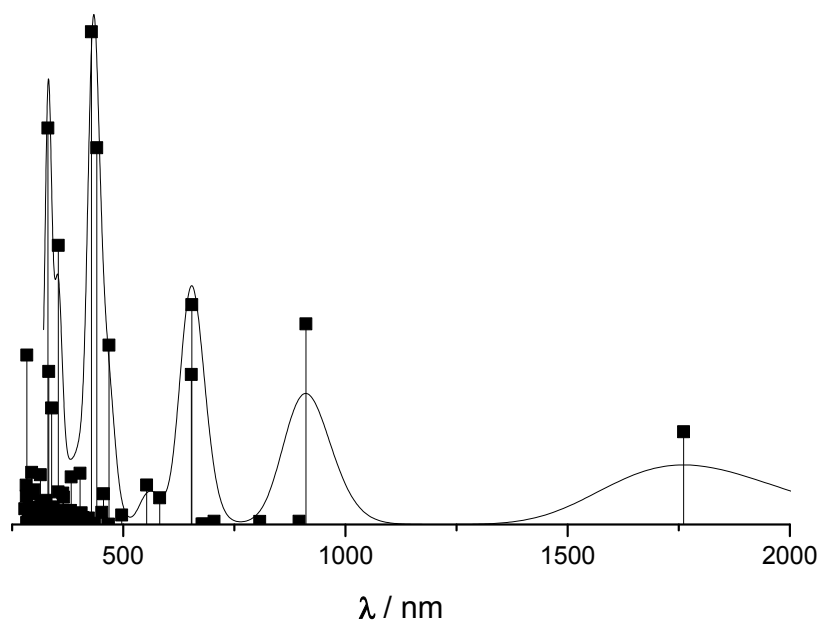

**Fig. S12** The calculated absorption spectra for  $1^-$ , showing the TD-DFTcalculated electronic transitions.

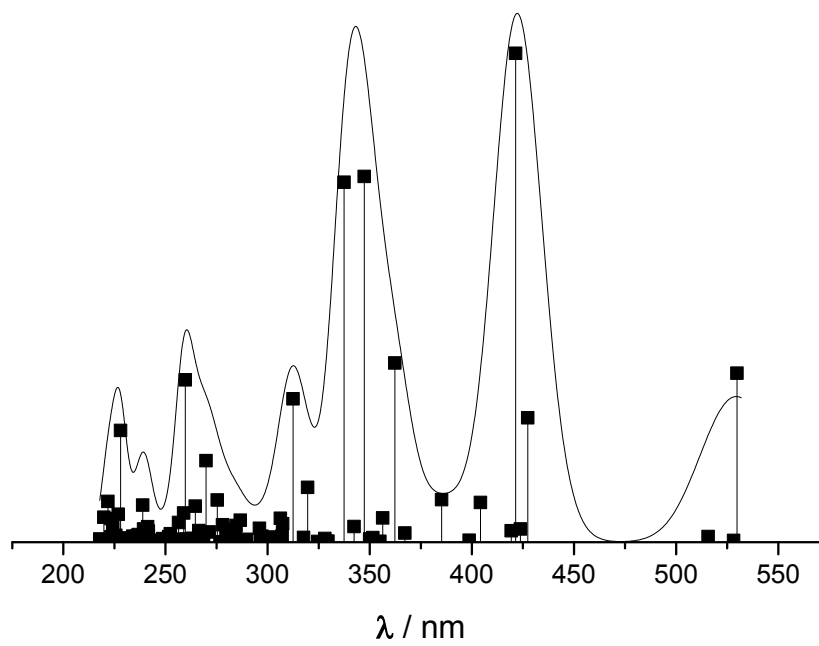

**Fig. S13** The calculated absorption spectra for **2**, showing the TD-DFT-calculated electronic transitions.

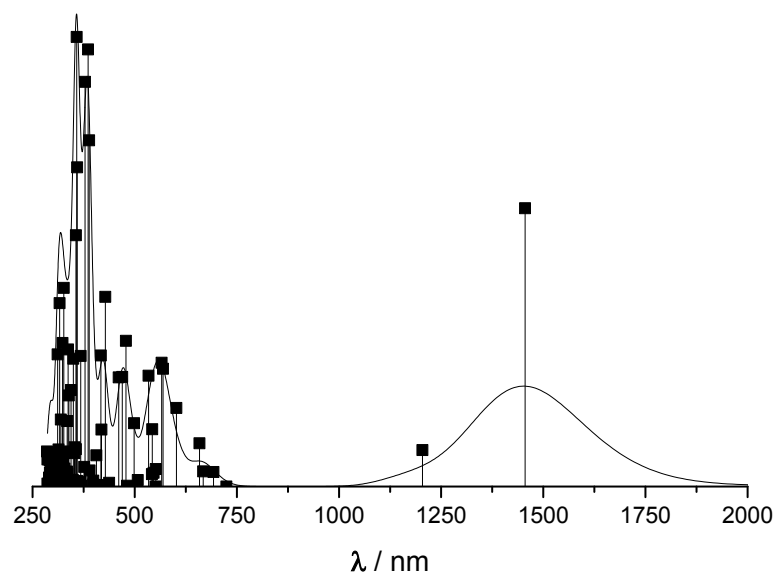

**Fig. S14** The calculated absorption spectra for  $2^+$ , showing the TD-DFTcalculated electronic transitions.

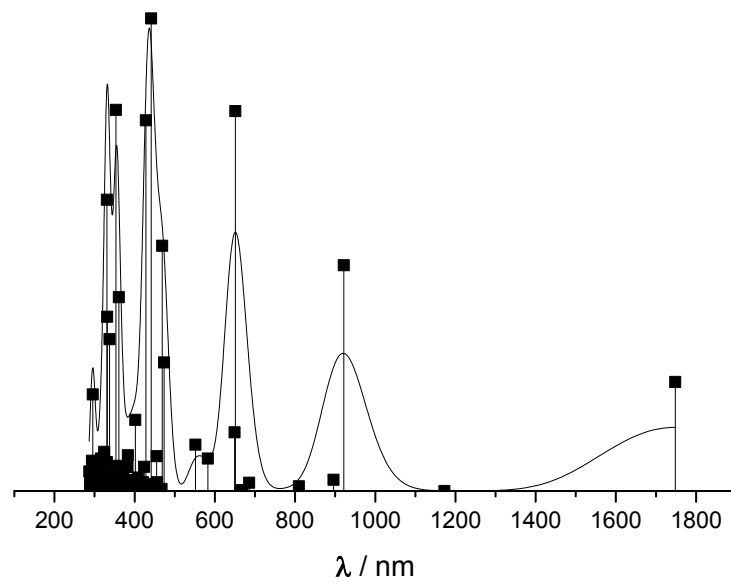

**Fig. S15** The calculated absorption spectra for 2<sup>-</sup>, showing the TD-DFT-calculated electronic transitions.
